# Supplementary material for: Analytical guidelines to increase the value of citizen science data: using eBird data to estimate species occurrence
Source: bioRxiv or medRxiv preprint supplement (doi:10.1101/574392), 2020-06-23
Supplement: Supplementary file [file media-4.pdf]

# Best practices for making reliable inferences from citizen science data: case study using eBird to estimate species distributions

A Johnston, WM Hochachka, ME Strimas-Mackey, V Ruiz Gutierrez, OJ Robinson, ET Miller, T Auer, ST Kelling, D Fink

## SUPPORTING INFORMATION FIGURE S1

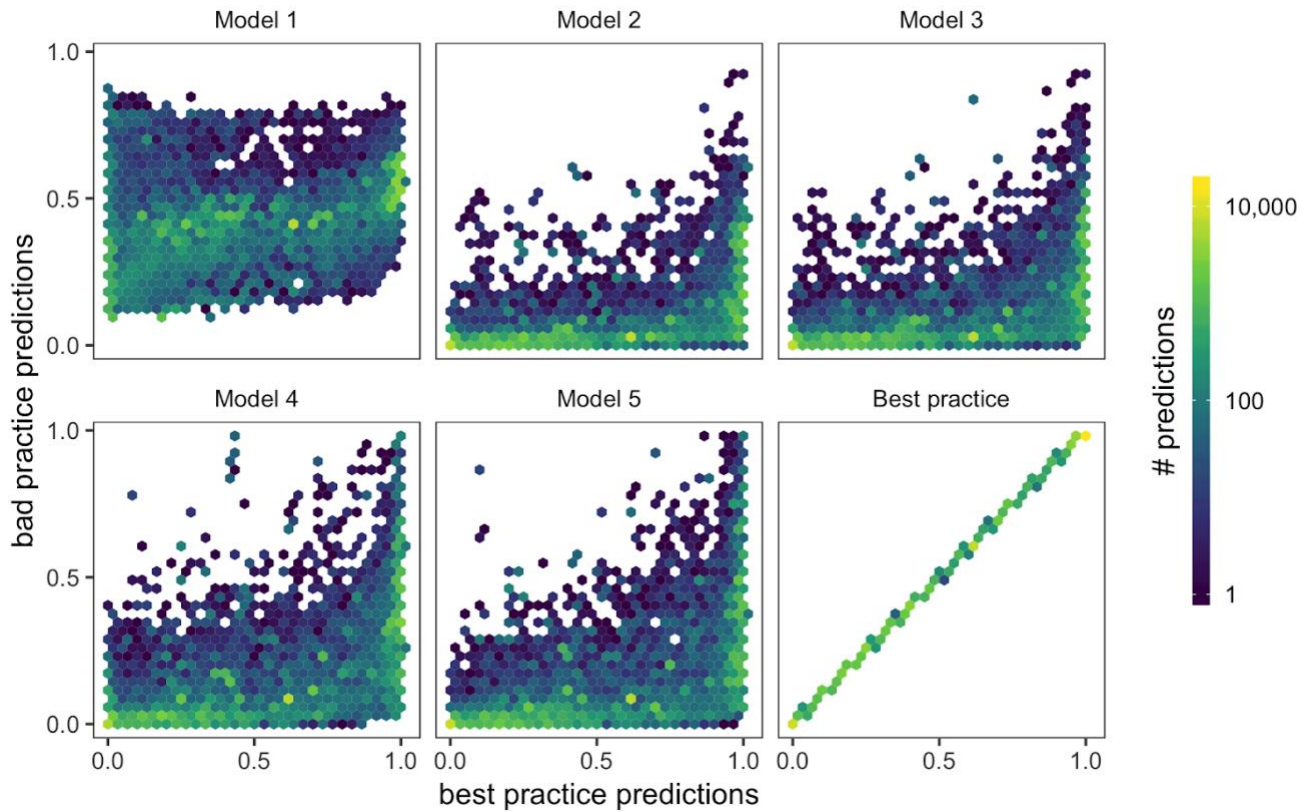

Figure S1. Density plots of scatterplots comparing estimates of encounter rate across the BCR27 region for models 1 - 6.
